# Supplementary material for: Adipokinetic hormones and their G protein-coupled receptors emerged in Lophotrochozoa
Source: PubMed Central journal article supplement (PMC5024129; doi:10.1038/srep32789), 2016-09-15
Supplement: srep32789-s1.pdf [file srep32789-s1.pdf]

## Supplementary Information

### Adipokinetic hormones and their G protein-coupled receptors emerged in Lophotrochozoa

Shizhong Li, Frank Hauser, Signe K. Skadborg, Stine V. Nielsen, Nikolaj Kirketerp-Møller, Cornelis J. P. Grimmelikhuijzen

Table S1. Primer sets used for cloning of *C. gigas* AKH and the four *C. gigas* AKH receptors.

**Figure S1. cDNA and corresponding amino acid sequence of the *C. gigas* AKH preprohormone.** The signal sequence (highlighted in grey and underlined) is followed by the AKH sequence (highlighted in yellow). The KR sequence (highlighted in green) is recognized by prohormone convertase that cleaves the protein C-terminally of the R residue. Subsequently the C-terminal KR residues are removed by a carboxypeptidase, after which the G residue (highlighted in blue) is converted into a C-terminal amide group. The C-terminal half of the preprohormone is highlighted in grey and contains two C residues (underlined) that form a cystine bridge. The cloned cDNA sequence was submitted to GenBank with the following accession number: KM205073.

**Figure S2. Dose-response curves of the activation of *C. gigas* AKHR1-A by various peptides.** (A) *C. gigas* AKH (Cg-AKH). (B) *Locusta migratoria* ACP (Lom-ACP). (C) *Nasonia vitripennis* ACP (Nv-ACP). (D) *Tribolium castaneum* ACP (Tc-ACP). The E<sub>50</sub> values are given in the boxes belonging to each panel. All other details are given in the legends of Fig. 5.

**Figure S3. Alignment of the amino acid sequences of *C. gigas* AKH, the three insect ACPs that were tested in Supplementary Fig. S2 online, and *C. gigas* corazonin.** Note that the AKHs and ACPs are all 10 amino acid residues long, while corazonin is 11 residues long, which might explain why corazonin does not activate the *C. gigas* AKHR1-A and -B receptors (Fig. 5). AKHs, ACPs, and corazonins have many residues in common, but the ACPs have RD or KG residues at positions 8 and 7 that do not occur at these positions in AKHs.

**Figure S4. Amino acid sequences and GenBank accession numbers of the preprohormones of the peptides given in Table 1.** The signal peptides are underlined. The biologically active sequences are highlighted in yellow, the dibasic cleavage sites for prohormone convertase are highlighted in green, and the glycine residues, which are converted into C-terminal amide groups are highlighted in blue. Cysteine residues that could form cystine bridges are highlighted in red.

**Figure S5. Amino acid sequences and GenBank accession numbers of the receptors used in Fig. 8.**

**Figure S6. Alignment of the peptides given in Table 1 plus selected AKHs, ACPs, corazonins and GnRHs.** It can be seen that the proto-AKHs are more similar to AKHs (and ACPs) than to GnRHs.

**Figure S7. Phylogenetic tree of the peptides aligned in Supplementary Fig. S6 online.** Again, it can be seen that the proto-AKHs are more related to AKH (and ACP) than to GnRH.

Table S1. Primers used for cloning of *C.gigas* AKH, *C. gigas* AKHR1-A, *C. gigas* AKHR1-B, *C. gigas* AKHR1-C, *C. gigas* AKHR1-D, and *C. gigas* AKHR2 cDNAs. The sense primers for cloning *C. gigas* AKHR1-A and *C. gigas* AKHR1-B contain a *Pst*I restriction site marked with green, while all the antisense primers for cloning the receptors contain a *Sac*II restriction site marked with red. A Kozak consensus sequence marked with blue was included in the 5' end of the sense primers, which began at the first nucleotide of the receptor coding DNA sequence to facilitate the gene expression in CHO cells.

| Gene                    | Sense 5'-3'                       | Antisense 5'-3'                  |
|-------------------------|-----------------------------------|----------------------------------|
| <i>C. gigas</i> AKH     | ATGCTCTGCAAATTCTGTATTCT           | CCTCCTAATGTTAAAGATTTTGA<br>GT    |
| <i>C. gigas</i> AKHR1-A | CTGCAGCCACCATGAATTCCGACG<br>CGGAT | CCGCGGTTCAGTGCTTGTCCATC<br>GT    |
| <i>C. gigas</i> AKHR1-B | CTGCAGCCACCATGAATTCCGACG<br>CGGAT | CCGCGGTCTTAATTAGTGTTGCT<br>ATAGC |
| <i>C. gigas</i> AKHR1-C | GCCACCATGGATGAACATCTTTTCG<br>ACT  | CCGCGGTCTTAATTAGTGTTGCT<br>ATAGC |
| <i>C. gigas</i> AKHR1-D | GCCACCATGGATGAACATCTTTTCG<br>ACT  | CCGCGGTTCAGTGCTTGTCCATC<br>GT    |
| <i>C. gigas</i> AKHR2   | GCCACCATGAATTTAACATATAGC<br>TAT   | CCGCGGCTACTTGAAATTGTCTT<br>GTT   |

1 ATG CTC TGC AAA TTC TGT ATT CTG GCT GTA GTA GCA CTG AGC CTT CTC TCG TTG ACG CTT  
 M L C K F C I L A V V A L S L L S L T L

61 GGA CAA GTT AGC TTT TCC ACA AAC TGG GGC AGT GGA AAG CGT TCT TCA TCT TCA TTC ATA  
 G Q V S F S T N W G S G K R S S S S F I

121 GCT CCT CAA GCT GAC GAT GCC TGC TGG ACG AAA TCA AAC GCC AAA CTA CTG TAC GAC TTA  
 A P Q A D D A C W T K S N A K L L Y D L

181 ATG CAG GTG ATC CAG AAA CAA GTT GAT CGT CTT GTT GCT TGT CAA AAC AGT AAC GAC GAT  
 M Q V I Q K Q V D R L V A C Q N S N D D

241 TTG CAT CGG ATA TGA CTCAAATCTTTAACATTAGGAGG  
 L H R I \*

Fig. S1

**A**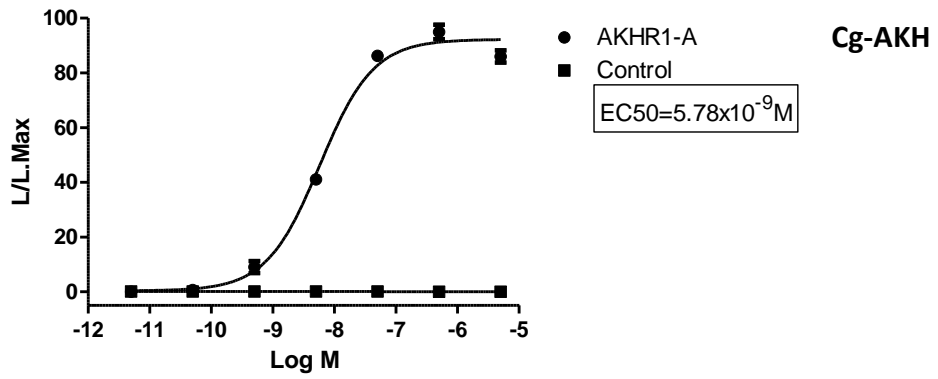**B**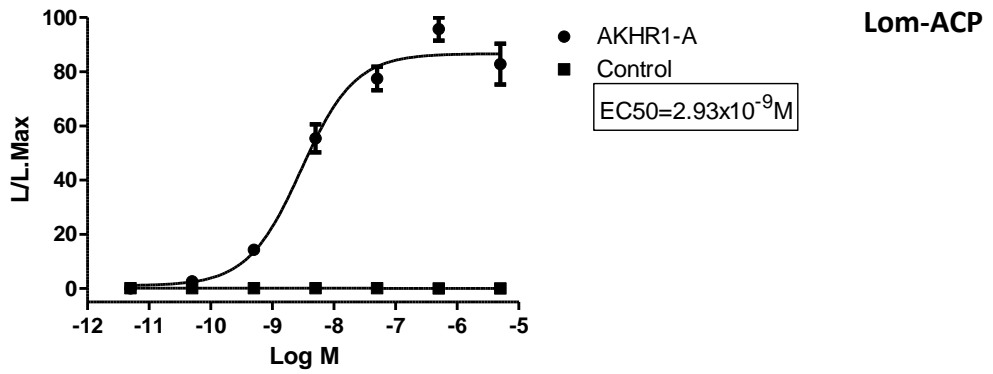**C**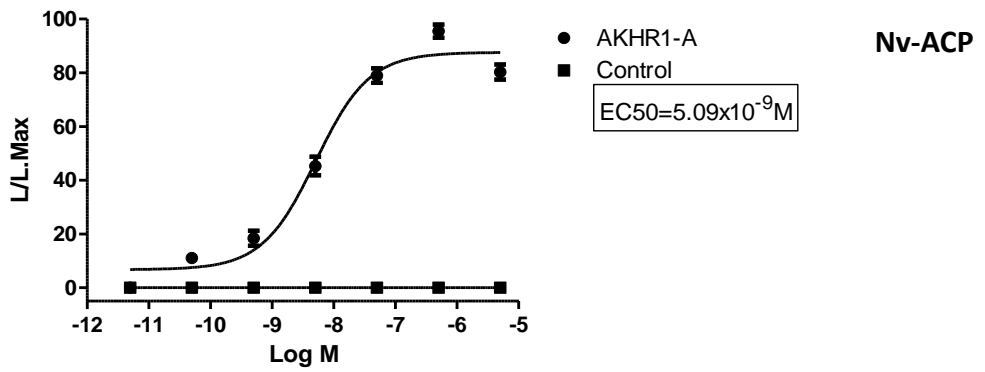**D**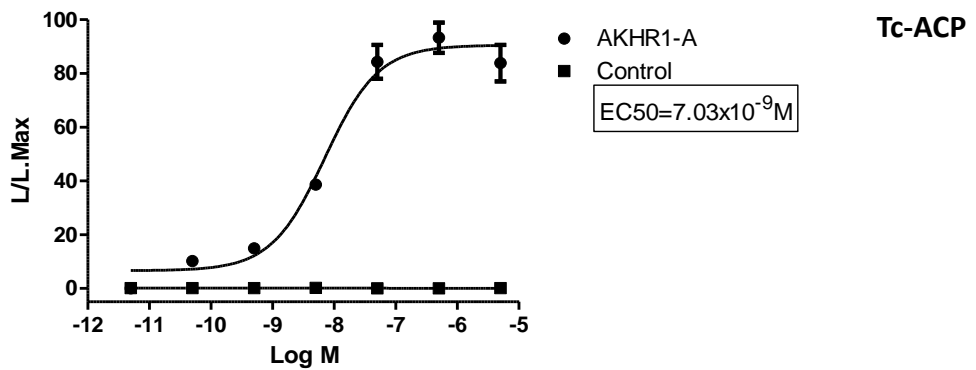**Fig S2**

Cgig-AKH **pQ-VSFS**TNWGSamide  
Lmig-ACP **pQ-VTFS**RDWSPamide  
Nvit-ACP **pQ-VTFS**KGWGPamide  
Tcas-ACP **pQ-VTFS**RDWNPamide  
Cgig-CRZ **pQ**NYH**FS**NGWQPamide

Fig. S3

**Fig. S4**

*Locusta migratoria* AKH-1 (P55319)

MVQRCALVVLLVAVAAALCSAQLNFTPNWGTGKRDAADFADPYSFLYRLIQAEARKMSGCSN

*Globodera rostochiensis* AKH (from EST, EE266432.1)

MPSLVFPTLCFFVSAVVLANSQMTFSDGWGKRSAVAPLALLADRHMTEPTKRQQKLPFANLFVSP  
DEDTLTMNPEMEACHAGYAQRLLIQLHEQMLSLFSTYQQCQTKAATETTKAMRQLR

*Hysibius dujardini* AKH (from EST, CF075783.1)

MGSAVQSLGLGFLGALLLVQVLFQVPTANSQLSFSTGWGHGKRSGNVPVNLAPADYRNGKANGDL  
CSAAYNEMAVARIQELIQEEGLRQLACRKR

*Priapulus caudatus* AKH (from WGS, AXZU01076239.1)

MHCILILATCLLGLYIHESSAQIFFSKGWRGGKRQEAPLMRHPTDVEEDTNQLVTTALGKESLKLK  
PSTEPLVDVSLRDAKAWHLTYRTPS

*Aplysia californica* AKH (XP\_012941224.1)

MESSSILLILVVLVIGTSTCLAQIHFSPDWGTGKRRAVSTVTEKEIPHQWQIADKEIIDIMLLIQRT  
AKKLSSCLNTCPPEL

*Crassostrea gigas* AKH (KM205073)

MLCKFCILAVVAVSLLSLTLGQVSFSTNWGSGKRSSSSFIAPQADDAQWTKSNAKLLYDLMQVIQK  
QVDRLVACQNSNDDLHRIW

*Lottia gigantea* AKH (from WGS, AMQO01003719.1)

MSLSRNLSVLVCLCCLLSMCLAQIHFSPDWGSGKRSAQVQTYPDSSNTNYDKLNTKILYQLVKII  
KKESEELTALLQDDDFLRR

*Bithynia siamensis goniomphalos* AKH (from TSA, GAQQ01002646.1)

MAQTTMTSLLAVLLLLSLVLTPTVTSQIHFTPGWGSGKRSGRDDPSSSSSSASSSSSHSSSSIPLPF  
SSIDSQWAEADFRLFLQLARLVKREAKRFSQLETENSMAENQENGPDFL

*Tritonia diomedea* AKH-like (from EST, EV287376.1)

MKIPDMHRTLHCSIPVLVLLMCVCSLAQIHFSPGWEPGKRSMEEPTRANKMACYDQLDMSLLLDI  
LKI IKRQAEKLSYTKSCPQL

*Hyriopsis cumingii* AKH (from EST, GW693635.1)

MQTTTCIIAVTLVALWTF TSAQISFSTNWGSGKRSGYQDLQSAACLDDLEINVMKDLAALIKMEANR  
AAKCIIDAKTRKLTGVYETPK

*Mytilus galloprovincialis* AKH (from WGS, APJB010624986.1)

MKSFFLICLLISLIGDSAEQISFSTDWGSGKR SFLESYENICKSKLEQSLIFDIASLVQVNICPSL  
GKDSLAF

Biomphalaria glabrata proto-AKH (from WGS, APKA01093331.1)  
MQNARFVTLTLLMTIGWTLGQIHFTPDWGNNGKRLSLTSQFEEESSYSSISGLEQTDLKFLLDIAKL  
LTKPEQTQKEPDLKLMKTKDLEVYK

Capitella teleta GnRH-2 (from WGS, AMQN01004296.1)  
MKHFLLLLLVACIVVAYHMNTASAQFSFSLPGKWNGKRAFSFSLPGRWGAQGKRASGWTGATTDCS  
RMESDGMMSVYAAIQEEAIKMLEMGKTSADKQDAS

Capitella teleta GnRH-3 (from WGS, AMQN01001996.1)  
MVVLVACSVLAFQLHSAEAQGFSFSLPGKWGGAGKRSGGVPWLKDGLGEGTYDPSLVVELYKIIQ  
AEAFRLNEMLKAQREGN

Capitella teleta proto-AKH (from WGS, AMQN01001098.1)  
MSCLIRVVIVLFLGLSLLVLCCDGLTQSLGWGSAGSPGKRNFERSYEAAGYNDQLMSSTECRMSAQT  
YRVMTDMLEREISRLQR

Platynereis dumerilii proto-AKH-1 (from EST, JZ447807.1)  
MRAWLVLLVACIVIAIYAHTSDAQFSFSLPGKWNGKRAALGWGKRGE GDFDPDAIFNVYRAIQ  
EALRINECMQKLEESKHH

Platynereis dumerilii proto-AKH-2 (from EST, JZ459150.1)  
MMRLWVVYLTVCVMMLFAFFPHVCHSGLTQSLGWGSAGSSGKR SVKSPIYYGDDDDYDYDVRQVRK  
NRLTLSEALCSQDEKDAISKIKKLIQREVVRQRYCNRKK

Helobdella robusta GnRH (from WGS, AMQM01007250.1)  
MNCLALFLACLVLSTVIILPAKSQFSFTPPGKWPFGTGKRDKIISDDDLTSFQEECFKQDPRILSQ  
TFLRLQKEANIAKECLKKIYPNARK

Lingula anatina proto-AKH (from WGS, LFEI01000562.1)  
MVTKHNMLWISVTVIVMVLQNTNCQWHQTLGWGAAGMVGKR TNPSSIFSQDSQDDSLCDDRRNSEV  
MKLIRDLLQVSDRCWSFLCRLSGSCHTRLSRCRG



**Fig. S5.** Amino acid sequences and GenBank accession numbers of the receptors used in Fig. 8.

>Acyrtosiphon\_pisum\_AKHR (XP\_003245941.1)  
MEVMSDANTVLHVS TKGVHVGPPPVWPGMDNVTNASMFDES NLPYDMKFNEGHVVAIVTYSILMV  
VSAIGNITVLTIIILKRRRKAGTRIHAMLMLHLAIADLLVTFLMMPLEITWAWTVQWVLGDPLCRIMS  
FFRIFGLYLSSFILICISVDRYLAVLQPMRLYQMDRRGKLMIAVAWIASVVC SLPQTYIFHVERHP  
NATWYEQCVTYNAFSSK LHELAYLYFGMFM MYWLPLIVILFCYASIIIEIYRRSRESICDNVRR LG  
FLGRAKSRTLKMTIIIVIVFVVCWTPYYIMAIWYWDHKSAQMVDQKVQHALFMFACTNSCMNPIV  
YGAFNIRTRRTLVTQVRPSASLASTACTTEIRLPALSISVRRVE

>Aedes\_aegypti\_AKHR (XP\_001655248)  
MSNAI LKTERDEVLNYSHSYGENYNNDVNTMPYVLS SSTS KTGVDNETWYGTNSSNWNEPLPIDM  
QFNDGHLKQIVVYSVLMVISAIGNITVLALLIKRRLKSHSRIDMMLTHLAIADLLVTFLMMPLEIG  
WAATVQWRAGDIMCRVMAFFRTFGLHLSSFVLVCISVDRYYAVLQPLNLSKSRGKIMILIAWAMAT  
LCSAPQPFIFHVEIHPNHTWYEQCVTYNTFSNDNYHTVYNILVMMFMYALPLLTIIICSYASIYMEI  
FRHSRMPNSEGFRRSSIDVLGRAKRRTLKMTITIVMAFVICWTPYYVMSVWYWLDQKSAENVDQRV  
QKGLFLFACTNSCMNPIVYGIYNV KLRKKKKPDGVKSGQSSVILRNSAKYTRHSESIRSSSGKIRG  
YRDL DIPSCAIKPV

>Anopheles\_gambiae\_AKHR (ABD60146.1)  
MPNTMAAHINQRIEDHRNLADWSYANETAGEEYYEMPIDMRFNSGHILSIMVYTTLMVFSATGNL  
TVLSILAQRKVRASSRINIMLAHLAIADLLVTFLMMPLEIGWAYTVRWTAGDLMCRVMAFFRTFGL  
YLSSFILICISVDRYFAVLKPLKVHEHRAVLMIAAAWIMSGLC SLPQAFIFHLEGHPNITGYQQCV  
TYHYFEEEIYQIIYNVLMCLMYTFPLIVILYCYGSIYYEIFSRTNPRNLESFRRSSIDVLGRAKR  
KTLRMTIMIVIVFVVCWTPYYVMSLWYWLDKESAKNVDQRIQKGLFLFASTNSCMNPVYGVFNVR  
KKHTKLLKTTHEKSCGSHLTMRA

>Apis\_mellifera\_AKHR (NP\_001035354.1)  
MESSIKIITTTGLENWRVNSNYTELLPIDMRFNEGHIVSIVFY SVLMIISAIGNTTVLILITCRK  
RVSKSRIHIMLMHLAIADLLVTFLMMPLEIGWAITVSWKAGDVMCRIMAFFRMFGLYLSSFVLVCI  
SMDRYAVAIKPLQLWDVDKRGKIMLSFAWIGSVVCSLPQTIVFHLETHPNVTWYSQCVTFNAFPTY  
THEITYSLFGMIMMYWFPLVVIITYTYSILLEIRRRSKKSEDDKIRRSSIGFLTRAKIRTLKMTVI  
IIAVFFICWTPYYVMSLWYWIDRNSAYKIDQRIQKGLFLFACTNSCMNPIVYGFNIRDRNKTSAR  
PTTIETRVTPLSLSLKLDD

>Aplysia\_californica\_AKHR (XP\_012941361.1)  
MPETHSCITSQKVLTKFTTTVSLIAMLFPAAMALATKHLHPPMTARLQEDPLSLQSPSALRSTVSG  
TENASSLDHTYEVQVVVEREFSKSGREDEINALNTAAVAATAASTTTPINNNSYSHCINLTLSE  
IQTNYTECLHPLPKELYFTDDNAVSVAAYSCLFVVAAVGNLTVFITLFRNRGVKSRINMFMHLAI  
ADLIVTFMMLPLEIAWHSTVAWKAGDAVCRLLMFFRAMGFYLSSCILVSI SLDRYFAIMKPLSISD  
AGNRSKMMLTISWFLSIVASIPQSIIFHVERHPKYKWF EQCVTFNFFPTPEHELAYNLF SIIALYG  
LPLVITSSYCVILVRISKSRQSKDEM RISGYDGTPAEQGGLRRSGIGNIERARSRTLKMTLVIV

GAYVLCWTPYFVISAWYYFDRTSAVKIDGKVQRGLFLFAVSNSCINPIVYGMFTAARRESKRWGD  
WLKTTFSYRSGSPRTYCGAGASHHCAL

>Bombyx\_mori\_AKHR (NP\_001037049.1)

MDIDEKVS GPGGASQKNWSHLLHVNNTYDELPLEMRFNYSHMVSMTVYSVLMVISATGNLTVLYQL  
VRRRAK RASRLDILLMHLAVADLMVTFLMMPLEIAWAGTVQWFAGDLMCRVMMFTRTFGLYLSSF  
VLICIAVDRYYAILKPLNVTWEATVRRRAIIVAWVCAGLASLPQSFI FHVEEHPEVKGYNQCVSYGS  
LPTEKHEFAYFLVNMILMYVIPLVSTLYCSCAALFEI IRRANTANDKMRRSGIGLLGRARARTLKM  
TVTIVLVFFTCWSPYYCYCLWYWIDKESIKNLDPALQKAMWLF SCTNSCANPIVYGVFNRRNRWNWR  
AGKFQNGRCRSGS GRKGSRLPHGESTEISAATLSRARHSNGSDHNGRRDSSYANQNGPQKHWTIN  
NNHVTNGMV

>Caenorhabditis\_elegans\_AKHR (NP\_001249720.1)

MTTINCSRSVPPDVTVNDSVLSIVFTYLALFILAFVGNVTMFLILCRNQLVKVRRVHSLLLHMNIA  
HLLVTLVVMPEILHNYMVAWFAGDVMCRICKFFDVFAISLSMNVLICITLDRFY SIFFPLYAMRA  
RKSVMQRMVSFAWTISFVTSAPQLYLFKTATHPCFDWYTQCVSKNFIGELSNDVFFFSIVNIIQVY  
IAPLFVTVCYSLILWRISRKSKLVGEKESEKSEL LLRRNGQNNLEKAKSRTLKMTFVIVLAFIF  
CWTPYSILMFLHFLRHTDWIPKDIRKFIYAFVLSAISPYLYGYFSFDIRKELQLLFACSKATAA  
DRHLSCSANVSRNQVTERMRKRSASACNFDGGKTNNTLSPRPPRGHSLRHKPS SSGIDKRHNHVQL  
EIIDF

>Capitella\_teleta\_AKHR1 (ELU01220.1)

MNFTTSLDVWQQENASTVGPAGAPPREIQFNGDSVVSIVTYSVLF CFSAVGNLSVFLTLVAARYQ  
RRASRVSLFILHLTVADLFVTFVMIPMEIGWHVTVSWKAGDVACRLLMVLRTFGFY LSSLILIAIS  
LDRYLSIAHPISIQSAGRRSRIMILVAWVIGFIASLPQSLIFHAAQHPEFELYVQCVTFGSFPTQA  
HELAYNLFNMFLLYSIPLIAIVLVCYSLILREMDASQNTFEIMADPDPVIGQ TGRLDKARLHTLKMT  
IVIVAVFIVCWTPYFIMHILWWIDKNTAEKVNPKIQRGLFIFAVSNSCVNPVIYGYFM

>Capitella\_teleta\_AKHR2 (ELT92261.1)

MDCSEALIACGDPYHGLPLNETANTS DSNFEVPRELLFNTDAIVSVSILGVMFLVAAVGNLTVFAI  
LFFNRHSRLSRVSIFIMHLSISDLIITFIMI PMEIGWHVTVAWKAGDVGCRVLLFFRAFGFY LGSF  
ILVAISLDRYLSITKPLSLVDAGKRGRIMLRF SWLFAFVAAI PQSII FHVEQHP IHTWFSQCVTFN  
FFPSDQHEMAYNVSTVCMYVVP LLLITACYSLILREVSKKTSSTRTVSGGQCRVRMSGNGRLKMA  
KARTNLTLMTIVIVLVFVICWSPYFCMLLVWIDRGQAVKVPKLR AIFIFAVSNSCVNPVFYGT  
CSHIYINGASMSTSMKPRYSNVCLN

>Capitella\_teleta\_AKHR3 (ELU00909.1)

MEYMNNQSELDPTSWTVEMDNYTAASIPRDMVFGEGLISVIAYCILFLIAACGNLTVFITLYRNR  
HRKSRVNLFIMHLSVADLIVTFIVLPLEVTWHITVAWYAGDAACRIIMFFRAMGFYLSSFILIAIS  
LDRYFAILHPLSLNDADKRSKLMIIFSWAFSVIASIPQSII FHVEQNPTYSWFSQCVTFNFFPSEG  
HELAYNMFNMITVYALPLVVIIVSYSLILCEMTRKTRESQEDVKAPSKMNASERLRRSNVGH IQRA  
RIRTLRLTIMMVLVFILCWTPYFVMSSWWWF DRESAAKVDPRIQKGLFLFAVSNSCMDPIVYG

>Capitella\_teleta\_AKHR4 (ELT96363.1)

MGSP TNSCDTCAPDLMTVAPSEVPSEL TGSANNLLSITAYSVLMVIAACGNLTVFITLFRNRHRKS

RVNLFIMHLSIADLVVTFIMLPLEIAWHTTVAWIAGDVACRILMFWRTFGFYLSSFILIAISLD  
FAITRPMSSLDADRRGKMLLILAWLFSIVASSPQSVIYHVESHNPWFKQCVTFNFFPTTTHQMI  
YNVFCFSALYLAPLVVIVISYSFILIEITKRSREGRGGPDHVKRKQSTNSMIASSTGSLRRSGVGRM  
EKARIRTLKMTIVIVFVVMCWTPYYAMI IWHWVDKTSAEQVDEKIQRILYLFAVSNSCMNPVYV  
VVHHPTKEKDAIRVSLAALCLFDPFAAQSTFQDNDQ

>Capitella\_teleta\_AKHR5 (from WGS, from AMQN01016278.1)

MGMEPCAAASKLECHSDGTTILPVQVVTDPDITFNDERALAVAGYSILFAIAALGNLTVFITLIR  
NRRKRTAYSRLNLFIMHLCIADLIVTFVMMPLIVWHVTVAWLAGDVACRLLMFWRAFGFYLS  
LVAISLDYFAIARPLSLADAHSRGRLMLVLAWALSCVASIPQSVIFHIERHPKYPWFSQCVTF  
FPSRHELAYNLFNISAIYGFPLLIVVFSYSAILRHMSQRNASQHLRNRLQKSKLYSSTVSVFF  
ICWTPYFVISAWWWFHHSSADKIHGQVQKGLFLFAVSNSCMNPVVYGMFSTVCRRTLSRLRKQAY  
DYL SLCMATPEE

>Crassostrea\_gigas\_AKHR1-A (KM205066)

MNSDADADTTIRFNQSSLYEDVYSTAPNDGVLLMKFTCENGFDEFQKNGSCQNNTTEMLPMDLVFT  
DENMVTIVAYTCMFIVAACGNLTVFITLFRNRNIKSRVNQFIFHLSIADLVVTFIMLPLEIIWNIT  
VAWKAGDPACRILMFFRILGLYLSSFILVTISLDYFAIVHPLSLNDADKGRIMLILAWCFSIVA  
SIPQSVIFHVETHPKYRTRFRQCVTFNFFPSHNHELAYNLFNLITLYALPLLIITTSYSLILWEISK  
KTKQCKEETKCLSTRSRLRRSSVGNMERARIRTLKMTLVIVSVFVICWTPYFVLSAWWFSDSASQ  
LDPKVQRGLFLFAVSNSCMDPIVYGMFTINFKREFVRCCCLKTSWKRHKLQRLTGKQFQTSTGVQR  
GPLSHTASNNSCRSLPGTNVVKFFDDAAICGNNGSPVLSRDLLKPKLDTGSRRANVNNFMKVNLP  
ALEKSVTMDKH

>Crassostrea\_gigas\_AKHR1-B (KM205067)

MNSDADADTTIRFNQSSLYEDVYSTAPNDGVLLMKFTCENGFDEFQKNGSCQNNTTEMLPMDLVFT  
DENMVTIVAYTCMFIVAACGNLTVFITLFRNRNIKSRVNQFIFHLSIADLVVTFIMLPLEIIWNIT  
VAWKAGDPACRILMFFRILGLYLSSFILVTISLDYFAIVHPLSLNDADKGRIMLILAWCFSIVA  
SIPQSVIFHVETHPKYRTRFRQCVTFNFFPSHNHELAYNLFNLITLYALPLLIITTSYSLILWEISK  
KTKQCKEETKCLSTRSRLRRSSVGNMERARIRTLKMTLVIVSVFVICWTPYFVLSAWWFSDSASQ  
LDPKVQRGLFLFAVSNSCMDPIVYGMFTTTFRRETQKWGRWL

>Crassostrea\_gigas\_AKHR1-C (KM205068)

MDEHLSTNESTSLPSYLKFSNDYAHSIIISLGVVFLIGALGNIASFVTLLCSKNRKSPTNFFLLHLS  
SADLLVMFVIVPGEMIHNATIAWLGGNFLCKLYHFLWNFGQYVATFLLCCISIDRYLAFVFP  
LRSL TQSPRTRSFMAATAWVLSAILSAPESVIFHVETHPKYRTRFRQCVTFNFFPSHNHELAYNLFNLITL  
YALPLLIITTSYSLILWEISKKTKQCKEETKCLSTRSRLRRSSVGNMERARIRTLKMTLVIVSVFV  
ICWTPYFVLSAWWWFSDSASQLDPKVQRGLFLFAVSNSCMDPIVYGMFTTTFRRETQKWGRWL

>Crassostrea\_gigas\_AKHR1-D (KM205069)

MDEHLSTNESTSLPSYLKFSNDYAHSIIISLGVVFLIGALGNIASFVTLLCSKNRKSPTNFFLLHLS  
SADLLVMFVIVPGEMIHNATIAWLGGNFLCKLYHFLWNFGQYVATFLLCCISIDRYLAFVFP  
LRSL TQSPRTRSFMAATAWVLSAILSAPESVIFHVETHPKYRTRFRQCVTFNFFPSHNHELAYNLFNLITL  
YALPLLIITTSYSLILWEISKKTKQCKEETKCLSTRSRLRRSSVGNMERARIRTLKMTLVIVSVFV

ICWTPYFVLSAWWWFSDSASQLDPKVQRGLFLFAVSNSCMDPIVYGMFTINFKREFVRCCLKT  
SWKRHKLQRLTGKFQSTSTGVQRGPLSHTASNNSCRSLPGTNVVKFFDDAAICGNNGSPVLSRDLLK  
PKLDTGSRRANVNNFMKVNLPALAKSVTMDKH

> *Crassostrea\_gigas\_AKHR2* (KM205070)

MNLTYSYQFTDLSEVEKVEETMKIMNTTVGTGSGNMSDKGLPREMTFNDDNVMSVIAAYACLFLLFAA  
SGNLTVLVTLKSRRYKSRVNTFIMHLSIADLIVAFIMLPLETAWHVTVAVEAGDAACRIILMFFRA  
LGFYLSFVFLVAISLDRYFIVHPLSIHDADRRGKIMLTMALLSIIASLPQSIIFHVERHPLFTW  
FEQCVTFNFFPTEQHELAYNLFNVITVYLLPLVIITTSYSLILYKVKSTARRDEEERREFGLYTHR  
SHTYPLSRGLISCTRAGIIGKARIRTLKMTLVIVTVFVLCWTPYFLMVSFWFIDRESAKNIDTKV  
QRGLFIFAVSSACLDPIVYGMFTAARKEARRWLGWFKDRLNRMGIYTMPTNTASEQDNFK

> *Culex\_pipiens\_AKHR* (from WGS, AAU01041683.1)

VTFLMMPLEIAWAWTVQWVAGDIMCRLMAFFRTFGLYLSSYVLCISVDRYFAVLQPLKLSKARGK  
IMIIGAWMFSTVCSSPQALVFHVEPHPKVSWFLQCVTYNSWNGNYQFIYNILGMVFMALPLLTII  
CSYASIMEIFRHSRMPNSDGFRRSSIDVLGRAKRRTLKMTITIVTVFAICWTPYVMSVWYWLDA  
SSAYSVDQRVQKGLFLFACTNSCMNPVYGV

> *Daphnia\_pulex\_AKHR* (ACD75498)

MCSNDSSSLSGNMCMTEDEASFGESTVNPEFDSASSISGGSSSSTTTTVDLSMLPIDMTFNDGHV  
VSIATYSVLLIISVCGNITVLVNLIKRRHISNPRVNIMLTHLAIADLLVTLMLLPIEIGWAATVQW  
RAGDFSCRMLAFFRTFGLFLSSFVLCISIDRFGAILQPMKLDYWKRRGRFMLAIAWACSVICSLP  
QVFVFHVKAHPEYPWYEQCVTFDSFPTKAHEISYAAFMMMMVYVLP LAVFVFTYSSILCEISRRSK  
EAVGQEEGIRRVTVGTGRARIKTVKMTLVII SVFIFCWTPYNIMSIWFWCDRDSALQVDQRIQK  
LFLFACTNSCFNPMVYGYFSRRTVRRSHHELHRKVYHPSRMASRALGPSLRVDCNSKSLEGAATE  
PCLPQQHLPVATADGPSCQGQAEPIFTASSIAVAVKRSNSWLNNRSNPTVVTHIF

> *Drosophila\_melanogaster\_AKHR* (AAC61523.1)

MAKVAEENDHRDLNSWSNVNDTNGTIHLTKDMVFNDGHRLSITVYSILFVISTIGNSTVLYLLTKR  
RLRGPLRIDIMLMLHAIADLMVTLLLMPMEIVWAWTVQWLSTDLMLCRLMSFFRVFGLYLSSYVMVC  
ISLDRYFAILKPLKRSYNRGRIMLACAWLGSVVC SIPQAFLFHLEEHPAVTGYFQC VIFNSFRSDF  
DEKLYQAASMC SMYAFPLIMFIYCYGAIYLEIYRKSQRVLKD VIAERFRSNDDVLSRAKKRTLKM  
TITIVIVFIICWTPYITISMWYWLKHSAGKINPLLRKALFI FASTNSCMNPLVYGLYNIRGRMNN  
NNPSVNNRHTSLSNRLDSSNQLMQQLTNNSLNLRGQVMAAAVSATTKLANVVS LKGTANGNSA  
AAAGTVPI TPPLTVTIAPLATDDEANDDSCLSAVTIRCQDQSPIRQK

> *Helobdella\_robusta\_AKHR* (ESN91517.1)

NLTVIITLTLCKKRQRRTREWFILNLAIADIFVALYNNPIEIAWAVTISWNAGDAACKILMFCRA  
FGFYLSFVFLVAISLDRYFAVAKPLSTGTADERGKIMLITAWTTAVFASLTQVFFYLAKHPNLENF  
YQCVVTNDSFPNHIVEMFYHAFNFISVYFLPLVVIIVSYSIIIIISKRSRQTIGCNSNRVTLRIS  
GLNRIEQARAKTLKMTIVIVLAFIICWTPYVLAAWCWLQDSVQNYVNQWIQEILFIFAISNSCA  
DPIIYGLL

> *Lottia\_gigantea\_AKHR1* (from WGS, AMQ001002634.1)

MIVPKLISMPPDDSMGT SKLYRKTSEENENTTMGAYSTNITLPREMTFNDDNLVSVIAYSCLFVIA

AAGNLTVFITLLRNRGFKSRVNSFIMHLSVADLIVAFIMLPMETAWHITVSWKAGDFTCRLMMFFR  
AFGFYLSFFILVTISLDRYFSIVHPLSIHDAEKRGKIMLTIAWILSVVASLPQ

>Lottia\_gigantea\_AKHR2 (ESP00340)

MAENQTDIRCNDSSLNVTPCNTFPSPRELTFNDDSLVSVITCSCLFIIAACGNLTVFITLFRNRN  
IKSRVNLFIMHLSIADLIVTFVMLPLEAAWHLTVAWKGGDMACRAMMFFRAFGFYLSFFILVTISL  
DRYFAIMHPLSLNDADRRGRIMLSLAWICSIVASIPQSVIFHVERHPVYEWFTQCVTFNFFPSPSH  
ELAYNLFNVI AVYGLPLVIITGTYSILICEISKSRQSQMQLESSIRQKGE LRRSAMGI IERARI  
RTLKMTLVIGKIHIVFFLLFLSGSLVD

>Nasonia\_vitripessnis\_AKHR (NP\_001161243.1)

MTTAPVNATTVASLDYDDLPI DMRFNAGHVVSIVTYSILMII SAVGNITVLALLRRRGNAARTRI  
NTMLIHLAIADLLVTF LMMPL EIGWAATVSWKAGDAMCRIMSFFRMFGLYLSSFILICISVDRYHA  
VLRPLQ MIDIDRRGRFMIAGSWICSALCSAPQMVVFHVEAHPTFTWYEQCITFNTFPSFTHELTYS  
LFGMVM MYWFPLIVIIYTYTSILAEMYRRSKD TTS DRIRRSSLGFLGRARVRTLKMTIIIVLVFFI  
CWTPYVMSLWY WIDSVTATKVDLRIQKALFLFACTNSCMNPIVYGAFNIRKGNKAPVRAPTIETR  
VTPLSLSIRLLA

>Tribolium\_castaneum\_AKHR (NP\_001076809)

MNFSETLWKM KDPM SASET VQDHRNLLDWSKTS LDNATEHKLPISMRFN EGHQLSIIIVYSILMVFS  
AIANTTVLV LIVKRRRKT PSRINTMLMHLAIADLLVTF LMMPL EIGWASTVSWYAGDAMCRIMMFF  
RMFGLYLSSFILVCISVDRFYAVLKPLYLRALDRRDKFMLLGAWLGATLCSIPQMVVFHVESH PNI  
TWYQQCVTYNVFPTYAHELT YLLFGMVM MYALPLAVI IFSYASILLEIRRTRN PYGDSVTRSSLA  
FLGKAKVRTLKMTIIIVLVFFVCWTPYVVMCIWYWLDRESAKNVDQRIQKALFLFACTNSCMNPV V  
YGVFNIRARRTGRKVS PRVNTIKHTSC IPTPNGDSRLPPLEISLKTLE

>Strigamia\_maritima\_AKHR (from WGS, AFFK01020326.1)

MSLQLSTTSSLWLQDNKSYTND SQNQFPPELQFGEHHLVSI VTYSVLMVISGIGNLSVLVSLVFRR  
RKKKSLVDLMLIHLAVGDLLVTFVMMPL EIAWAATVSWWAGDAMCRIFAFFRTFGLFLSSFVLVCI  
SIDRYFAVLHPMAIYYSYRRGKLM LIGAWIMSTIC SIPQII VFHVERHGQITWFEQCVTFNSFPSR  
IYELAYMFGMIAMYGLPLVVIIVSYGAILIEISMKSHEYKEQVQSSALGECRLRRSGFGNLSRAR  
TKTLKMTVLIVAVFVMCWTPYVVMCLWYWFAPESAKQVDPRIQKALFLFASSNSCMNPIVYGMFSF  
NCTLTLRPSTREEKRSKYLD SHRWSERTVVTNNLLDVESQDDPNGT CIAKVVTFPASMSTKESQDS  
D

>Aedes\_aegypti\_ACPR (XP\_001653920)

MIRGHTETTVAVIIVYCVLFIIAAGGNLSVVITLFRSRRHRRSRVSLMICH LAVADLMVAFIMIPL  
EVGWRTVQWHAGNVACKVFLFMRAFCLYLSSNVLCVSLDRCF AVIYPLRVSAARKRGKIML GGA  
WFIAFANAIPQSIIFRVQHHPNVPDFTQCVTFGFFTTPAMETAYNLCV VAMYFMPLMVISAAAYTV  
ILCEISNRSREKETS DTSHTGGMLRRCNDLTHIERARQRTLRLTITIVVVFVWCWTPYVVM TLYM  
FDRESALKVDGAIQDGLFLMAVSNSCMNPLVYGSYAMKCR RPWRRQMAPNGVQTPNAAQRSTGK

>Anopheles\_gambiae\_ACPR (ABX52399.1)

MYLAAGLLNIMDISLQHEYLQEYLQSAAMANFSGANPYGLGGFGGLAPNGTGLLGGLDKNGTEVT  
ITAPGHTDSTVAVIIVYCVLFVIAAGGNLSVVITLFRSRRHRRSRVSLMICH LAVADLMVAFIMIPL

LEVGWRITVQWHAGNVACKVFLFMRAFCLYLSSNVLVCVSLDRCFAVIYPLRVSAARKRGKIMLGG  
AWFIAFVNAMPQSIIFRVQQHPQVPGFTQCVTFGFFATPGLETAYNLFCVIAMYFLPLMIISGAYT  
VILCEISNRSREKETSSDSNSTGTMRLRCNDLTHIERARQRTLRLTITIVVVFVWCWTPYVVMTLWY  
MFDRESAAKVDVAVQDGLFLMAVSNSCMNPLVYGSYAMKCRLPCRRRNTLGGAQTPNAAQRRSTGT  
YGWWDWDCMRVHVLCPFIEQTLEFPRRKGRGHGSRPSFWKLYVCSYNSLFWKRVSMPTAMGSKNEP  
SVLHEYLEKHLI

>Bombyx\_mori\_ACPR1 (NP\_001127726.1)

MDESTQMDVTACNDTTCSDTTSTPEQNFVIGVYSILLVIGAVGNVAVLISLLRNRRRKSRSVLLMT  
HLVIADMIVIFYFIPIEIGWRKTNAWLAGNVACKFLQVFRGFGLYLSSNVLVCSVDRFFAIYPL  
RLAIARKRSKMMLYVAWAFALLLSLPQSAVFRVMEHPQIPDFKQCVSFEAFSNHQQELAYNVICLS  
AMYFVPLLVITICYLCIFYKISRNSKQNSEKEPPSNSRRVILRRSDQRPLVRARRRTLRLMTVTIVT  
VFACCFWFPYATMTLWYMLDWESAMRVPKRLQDFFFIMAVSNSCMDPLVYGSYTVDLRALILALRKI  
FCIRKEPTVLPGIKRPETITLVDQLRISQSRKRVRLSNPRDDLTPRTSSEPFAYRAHHSFSERAI  
IMKPTHSCDDFTLSSPKKWYSA

>Bombyx\_mori\_ACPR2 (NP\_001127745.1)

MKMVNLNFDYEDTKEVPTSEIDKKFWEYFDATSTEISNYSSADLVPLDQGPVLATYAILLAIGGVC  
NIAVLVKLAKPRRRKSVDMLMTHLALADVCVTCGVIPIEIGWKYTNAWLGGNFKLCKLLLVLRAFG  
LYLSSNVLVCSISIDRFFAVIYPLRLPEAKRRSRQMLYCAWVGALACSLPQSMVFRVKHHPRVIGFE  
QCVSFDAFNSYEQEVAYNVFCMCAMYFLPLIVITVCYVCIFCEIRKSSKELGDKYHSGLKPVRLRR  
SDRSLLERARRRTLRLMTVTIVSVFALCWLPIAIMAMWYMDRESASKVSRRIQDLLFAMAVSNSCM  
NPLVYGSYTLDIRGALRRFLKKCCSSTTPEVKQAGSSSNKNANFDTPHITEPKNIRTRLGVRFAE  
TSLTAVPERLEVPRAPRGA

>Culex\_pipiens\_ACPR (XP\_001842868.1)

MGRKSYTDSTVAVIIVYCVLFIIAAGGNLSVVITLFRSRHRRSRVSLMICHLAVADLMVAFIMIP  
LEVGWRITVQWHAGNVACKVFLFMRAFCLYLSSNVLVCVSLDRCFAVIYPLRVSAARKRGKIMLGG  
AWFIAFANALPQSIIFRVQQHPQVPGFTQCVTFGFFRTPGMETAYNLFCVIAMYFMPPLMIISAAYT  
VILCEISNRSREKETSSTHTGGMRLRCNDLTHIERARQRTLRLTITIVVVFVWCWTPYVVMTLWY  
MFDRESAIKVDGAIQDGLFLMAVSNSCMNPLVYGSYAMKCRWPWKRQNVPNGVATPNAAQRRSTDA  
VSGMAGPHSDRLTGRDNKDELMYEKERSIKLNQFGLANGAPGQTKIGMNSTGE

>Ixodes\_scapularis\_ACPR1 (from WGS, ABB010361713.1 and  
ABB010787461.1)

MADNQTYHHGHTSSGPENASSPSFPLPDDLTFNTLSLVQVIVYSVLFIAAAAGNVSVFFSFLGER  
HRKSRIKLMILHLVVADLIVTFVMIPLEIWRRLTVQWTAGNVMCKAMQVLRAFGPYLSSMVLVCIS  
VDRYFAVLHPFKVHDARRRGRMMLAAAWYTSLVCSSPQAFIFRVMEHPAMPGFYQCVTFAFFPSPW  
HERAYNLFCLLVLYGVPLAAIMLCYGCILAEIRRSSTECAADQATDSAPARGRLRLRRSDTRHIQR  
ARDRTLRLTVIIVLAFFWCWTPYVTMVLWYQFDPDGAGHVNGYLQSSLFMFAVSNSCVNPLVYGSY  
TTSSKCLTDKVRGSLGRVRDGGRCLLCRRSSGKTVVSSPWKPTSSVVKSVEPDRDCCSLCSDIHA  
SDYKLDPVDGKPKSVEVSVRSRDRPKSVCEVTGGSRGRYSV

>Ixodes\_scapularis\_ACPR2 (from WGS, ABB010171383.1, ABB010294885.1 and ABB010610796.1)

MPHTNHSEESSEILLDVNHPNWTDPGQQLFPEELTFNTQSLVQVIVYAVLFFVTAATGNI PVFFSLM  
GKRHRKSRLKVMIMHLAIADLIVTFVMIPLEVGRWRLTVQWTAGNVMCKVMQVLRFAFGPYLSSMVLV  
CISLDRYFAVLHPLKVNDAQRRGRIMLSWAWITSFLCSVPQAVIFHVMEHPQFPEFEQCVTFASFP  
SSWHERLYNLFCLLALYGLPLAAIVVCYSRI FWEIHRQSRDPQVVL LLDL SKQRQFQGRMLRR  
SDMRHMQRARNRTLRLTIIIVLAFSWCWTPYVTMVLWYQFDPDGAEHVNGYLQSSLFMFAVSNSCV  
NPLVYGSYTLTRRRFCVRCPPFGARDARTAPMTVPEVKPVVLPKDKTTVGDNSLFS SSSVYPYEL  
TIRFKGQLFSKCSKARHLPDCSCECALSG

>Ixodes\_scapularis\_ACPR3 (from WGS, ABB010083490.1, ABB010661157.1 and ABB011116016.1)

MSTARYGMTFGSII EETSTSNITSQKVALAEELSFNTQSAVQVVIYCILFIVAAGGNVPVFTLLR  
NRHRKSRIKLMIMHLAIADLIVTFVMIPLEVSWRLTVQWTAGNFMCKLMQVFRFAFGPYLSSMVLV  
ISVDRYFAVLHPLKVHDAQRRGKVMLAVAWYTSLVCSIPQAIIFRVMEHPAMPGFYQCVTF AAFP  
PGHEKAYNLFCLLALYGVPLAAIVTCYGRILWEIHRQSRDSDHDDQSTGAESNHGRLRLRRSDVRHI  
ERARNRTLRLTIVIVLAFFLCWTPYVIMVLWYQFDPEGAEHVDGYLQSSLFMFAVSNSCVNPLVYG  
SYTATFEKRCCGQTTSWCWVLGNVRCKENYKLSKQPSKQTVNSWVTRTPQCQQRELQKDWCSACSS  
EYVDLRSVLDKNEAGYCQSHVELTRSTTKLCRCVDSVVLVLP SAKQVS

>Ixodes\_scapularis\_ACPR4 (from WGS, ABB010179456.1 and ABB011086824.1)

MDSVQLPSLQNGSLEDPSLDEELTFNTQSLVQVIVYSVLFVAAAAGNVSVFVSLLGKRHRKSGIKL  
MILHLAVADLIVTFVMIPMEIGWRLTVQWTAGNAMCKVMQVLRFAFGPYLSSMVLV CISVDRYFAVL  
HPLKVHAAQQRGKMLAVAWCTSLACSTPQAFIFRVMEHPALPGFFQCVTFASFPSPWHERAYNLF  
CLLVLYGVPLSAILVCYSRILWEIHRQSRREPCADQLNGFKSPGGSLRLRRSDMRQMRARYRTLRL  
TVIIVLAF FWCWTPYVTMVLWYQFDPDGAEHVNAYLQSSLFMFAVSNSSVNPLVYGSYTTGFKNLS  
AKLKCCWSGGARTAQC GPSSKHTVDFWVAKR

>Ixodes\_scapularis\_ACPR5 (from WGS, ABB010141465.1, ABB010294885.1 and ABB010934409.1)

MAIPFEAAYEFRHSINTSTEDQRGDVFHNISPDQLLPEELTFNTQSLVQVIVYTVLFFVAAAAGNV  
PVFVSLLSKRHRKSRITLMILNLAVADLIVTFVMIPLEVGRWRLTVQWTAGNAMCKLMQVLRFAFPY  
LSSMVLV CISLDRYFAVLHPLKVNDAQRRGKIMLSWAWIISLLCSVPQAFIFHVMEHPQFQEFEQ  
VTFASFPSPWHERLYNLFCLLALYGLPLAAIVICYSRI FWEIHRQSRDPQVVL LLDV SKERQQFQ  
GRMLRRSDMRHMQRARNRTLRLTIIIVLAF FWCWTPYVTMVLWYQFDPDGAHVNGYLQSSLFMF  
AVSNSCVNPLVYGSYSSSRKGRWCRCPPFSETGIS SKTTTMAPPSVHQAVAAVKVPPTGDCSLFS  
SDSSVYPYEV TIRFKGSVARTTSAGGGGPVYSCSNCSAFAG

>Nasonia\_vitripennis\_ACPR (NP\_001164571)

MDQLQGSRMQLLQDFNNHDFRDNMSMAVPTMPPSMTFTRRTL TIIIVYICIFLVAAIGNLTVFLTL  
WRGRYRKSRI SLMICHL SIADLLVAF FTIPIEIGWRLTVQWIAGNYACKLFLFLRAFGLYLSNNIL  
ICVSLDRYFAVLYPLRVNDARRRGKFMLSVAWFFSVLYAIPQSIVFHVENHPHKNFTQCVTFGAF  
PSDLVENTYNVFCVLTMYFIPLAII CWVYLKILCEISSKSRDNKPAGSNGTLESSNSNQSRMLR

RSDMSSIERARSRTLKMTIIIVVAFIFCWTPYITMNLWYVIDKKSMAKEVNEMVQESLFI MAVGNSC  
ANPLVYGSYAIDLKKECFRCFLPCTTTKSNADVNLIQRSLGSKFQKPEMKSPGVSKQIVHSVCQAV  
HGFFKAGSGQTKSTNVCGKVLVPI SPRLSVSTTSKGVVVEKLP LHTIKPIEFKENLIKSPSCSQPP  
LLQLNSSMNFSGIMEHQTA

>Strigamia\_maritima\_ACPR (from WGS, AFFK01021969.1 and  
AFFK01021968.1)

MNDCTAAPASNSCTHPIMDWNLTSSSEMTFSEQIRPNLSLTLPLHLTFTRDSLIRVSVYGILFVVA  
VGNLTVLITLLKNRRRRSRINMMILHLAVADLIVTFIMIPLEMGWRLTVQWVAGEVACRTFLFLRA  
FGLYLSSMVLVCVSLDRYFAILHPLKVND AQRRGKIMLLFAWTISILCSVPQSVVFHVQRHPDYPF  
FEQCVTFNSFPTDNHELAYNMFCLAMYGVPLLIVFVYTRILCEISNKSRETRDELERDGRIRGR  
FRLRRSDMTNIERARARTLRMTIIIVIAFIWCWTPYFVMTMWYMFDRSATQVNQNSVDERLQESL  
FMFAVSNSCVNPLVYGSYAVNFRREYTRCLCCKKNLRRKTPVPA

>Tribolium\_castaneum\_ACPR (ABX52400.1)

MQAVGKMGEHYDEDSKSNFVSLNETLDGFANETVSPDVL FQQNLTVILVYSALFVVA AVGNLTVF  
ISLFRSRHRKSRI SLMIRHLAIADLIVTFIMIPIEVGWRLTGKWIAGNVACKVFLFLRAF GPYLSS  
NVLVCVSLDRYFAVLHPLRVNDARRRGKIMLAF AWGTSFVYCI PQSFVFRVRAHPKYPNYEQCVSF  
GFFENTAQEIAYNLMCVMCMYFIPLFVIIVAYTAIMCEISKNSKETKGESYRTSNGRMRLRRSDIS  
NIERARSRTLRTITIVAVYVWCCTPYVITMWYMFDRASATSLPXWLQDTFFMMVVSNSCMNPIV  
XGSYVIN FQRVNCNCFXKTASESHLNVGSGATRSTAMVHGAGNGYTRSPTPKSNLNL TGLLSK  
SRLPDKPPSVGHISFLSEPR TARNYRSSFHSEPCSRTRMCPDELCLDTSCHSADYYSSAVL

>Aedes\_aegypti\_CRZR (from WGS, AAGE02020874.1 and AAGE02020871.1)

MATNLSSILFESLYTNAATATAANGSPSDSYTTTDAFIGTQWTPAAALGSL LATERSETSPDGANG  
TGWNKVPHQQLLLLVP SYLSTLATMAANIVEANTTTNVTLSYEDCSLLNVTYGT DGLSTSHPWILC  
LPHAPTLSKTGVIRVVLSAMAI VSL LGNIATMWSIRKNRKSRR LARHNWSAIYSLIFHLSIADLL  
VTVFCIIGEAAWSYTV EWVAGTVACKLFLKLLQMFSLYLSTYVVLV LIGVDRWVAVKYPMKS LNTARR  
CHRFLCGAYSLSFLLSIPQWMI FRVAKGPFLEDFYQCVTHGFYTD RWQEQLYTTFTLVFMFI IPLL  
ILIGTYLSTFRTISSSEKIFRIETSAVDRSYRRSDTNRQRLIHKAKMKSLRISVVIVVVFIVCWT  
PYYIMMLIFMFLNPTERLGEDLQ TGIFFFGMSNSLINPLIYGAFHLIP IRRRRNQYNQHVREGSVY  
FQRSSTCANNQNGNHQQLLQQPASPPQLELHSQH HHHHHSHHHQPVPQPRNSYLA ANHKMSHSHSNL  
AEEISLMALEKDLKSLDENVNQINLKGTSGGKRSLARKFYSLSQLRRRTRPTKL

>Anopheles\_gambiae\_CRZR (AAQ67361.1)

MPPSFNLSTVTYELISGNVSAALENFTAS MAGAFPFDLHDPASSIARNASFTLGLGLANVIQLQQ  
QQQQQLHHS PHQYHQVQHQPQPSTPFANVSTGQNESLANLLLHPGVHQLSSGLVTLVGDIMAQ  
SGDTILPREECDRLNISYAFENGTALEIPGLSCYEHAPTLSKSGVIRVIVLSAMAI VSL LGNVATM  
WNIQKNRKSRRVTRHNWSAIYSLIFHLSIADVLVTGFCLIGEA AWYYTVDWVAGNLFCKLFLKLCQM  
FSLYLSTYVVLV LIGVDRWVAVKYPMKS LNTARRCHRFLFVAYLLS FLLSTPQWMI FRVAKGPFVED  
FYQCVTHGFYTD RWQEQLYTTFTLVFMFI IPLLILIGTYLSTFMTISSSEKIFRIDTSAVDRTTY  
RRSDTNRQRLIHKAKMKSLRISVVIVVAFVVCWTPYYIMMLIFMFLNPTERFGE DLQSGIFFFGMS  
NSLINPLIYGAFHLVPIRQRNQYNQHVREGSVYFQRSSTFNH HNGHQRNLNPHIKFNSHSHSNLPE



EISLMSLEKDLRSLDENVNQIHQKGGGGGGGGGGGGGGVGGGIGLSLGGGAAGVDGSRRIKRRSFAS  
KFLSFSRLLQRNHPTKL

>Apis\_mellifera\_CRZR (NP\_001137393.1)

MTILNNYTTYMLLACDNLTNFFNHTRDLTLDLSDRLWNTSELSPHFSYNLKNITCLEQAPHSNGNTL  
FKSLILTIMAVVSILANLATIYSIVRCRRRHHSWSAIYTLILQLAVADLFVSVFCIGGEAMWNYTV  
EWIWGNVACKLFKFFQVFSLYLSTFVLVLLIGVDRFFAIRYPMKGMNTADRCLKFIVAAILSFVLS  
LPQIIIFRVVQGPVFEKFEQCVTYGFYTEPWQEQLYVSFGLFSMFLPLGILIATYVFTIITISRS  
ERMFVKLANNDICHVNGDVNRRLMYRAKAKSLRISIVIVTAFIFWWTPTYTMMIIFMFSCPDKH  
VSEDELQNIIFFFGMSNSLVNPLIYGAFHLWPRKRRNFMHREISTTQRRLTPTSYGSSYRRDSRETR  
IPILPKN

>Aplysia\_californica\_CRZR/GnRHR (XP\_012940604.1)

MDGTDSDGSILQRANQAFGLASSGGLQLPIPNFSAQNSSVHRKRHDVYSPRSAHHDFFILASDNIS  
SLLLNTTAPNMISNNSFFEFQLNTHPSNVTFENAPTFTTSLIKTIVFGIMFGISFVGNMATIV  
QMRRLRRRKSTINTLIVNLALADLLVTFFCIAGEAAWTVTVQWLAGNVMCKFVKYMQVFALYLSTY  
ITVAISLDRCAVAILDPMRRNGAAQVRMTIVFAWIFSAFSLPQPIVFNVLVLRGPFKEVYQCVTFG  
SYDSAWQLQMYAIASLMLMFVLPVAVMGTAYGLIFTTISRKSKEHSVMDSIQMPARKTWVTRWVNY  
KRYLCMAFCSKPISSRIMSSEDHAARGPVRSYLLRKAARSLIMSFVIVLAFMVCWTPYYII  
FICITFLDKVIDPVI FNYFSFIGLSNSMLNPMIYGAFQLCKVQFYNPSSWRRNVWRGTSPKLQSSN  
PNRRSDFPPGTPASSSISRDSRNLLGQGQGCHCQTCHYEAKEQKVCIPALDRKAQASKTSTKSSE  
RCGKFTHKHFTNGEVKHCLCFHSY

>Bombyx\_mori\_CRZR (NP\_001127719.1)

MDNEGNSTILYDANIMYPSELTLRTEFNTDGNMNVCAIWPIEKIEILKLNDDTKTDDILGRSFIY  
NDTQQLTCLEHAPVLTKTTVIRASVLSAMAFLSFIGNVATIISIRRSKRCRGRARPSWTAIYSLIFQ  
LSIADLLVTIFCIAGEAAWSFAVQWYAGNIGCKLFKFLQMLALYLSTFVLVLLIGVDRWLAVKYPMK  
SMATATRSRGLVIAWVLSVILSIPQAVVFRVAKGPFEEFHQCVTHGFYTERWQEQAATLTLVLF  
MFILPLIILVSTYVSTVRTIAQSEKVFKEVRRQEKYFTPDMNRRRLIDRAKMKSLRMSVVIVAAF  
LIWWTPTYVMMIIFTFLNPDKNQSEELLNGIFFFGMSNSLVNPIIYGAFHLWPRKKRSYQHSRES  
GGHHASILRRGDNNTSSVRLTTIRSLRSSAKYSNGQNISLL

>Culex\_pipiens-CRZR (from WGS, AAWU01031675.1, AAWU0103176.1,  
AAWU0103178.1 and AAWU01031683.1)

MAANLSSFLYESFYGGNATVLDNYTSSTPYDTFQLDGSWPLTTPVSSSTFFPSAEEDNGTGLHQLS  
TYLSANLTGIVAVYSQEVQQLQNI FTTPDGASSHPGVFCLPHAPKLSRSGVIRVLVLAAMAI VSL  
LGNIATMWSIQNRKSRRLARHNWSAIYSLIFHLSIADLLVTVFCCIIGEATWSYTVAWLAGTVACK  
LVKLLQMFSLYLSTYVLLVIGVDRWVAVKYPMKSLNTARRCHRFLLCAYSLSFLLSIPQWMI FRVA  
KGPFFLEDYQCVTHGFYSERWQEQLYTTFTLVFMFIIPLLILIGTYLSTFRTISSSEKIFRIETSA  
VDRSYRRSDTNRQRLIHKAKMKSLRISVVI VVV FIVCWTPYYIMMLIFMFLDPTDGLVEDLQGTI  
FFFGMSNSLINPLIYGAFHLIPIRRRNQYKQHVREGSVYFQRSSTCENNQQPNGTSPHQLOPSPTP  
VPPLRSPGSVPLGPLVGTPIGITSKQLAVARSNSNLAEIEISLMSLEKDLKSLDENVNQIHQKNSA  
AASSRRSLARKFITLTQLLSRTKPTKL

>*Daphnia\_pulex\_CRZR* (EFX87464.1)

MTVYHINQSDPNILIPYVITSKDFRDNSSLLEEEAPTLLTTSASVKATVLCVMAVASLIGNLATLIS  
IAVSKKGTSSSLYTLLFQLAISDLLVSVWCLSGEAAWYTVVEWKGGQFLCKTFKFSQVLIIGFDRLR  
AIRRPISHRSCLKPICVAWILSAVLASPQLLIFSVLRGPFRELFYQCVTYGFYTEEWQEQLYTVFS  
LLTMFVIPLIVLIGCYVCIFCTIAKKERAFVIRAPHPSMERWPAESAASVSHFRTRDCQQHRQHSPQ  
RHQHTSFNRRRNIFKRAKMKSLRISIIIVTAFVICWAPYYFMMITFIFLNPDDKLGEDMQSAIFF  
FGMSNSLVNPLIYGAFHLWQPNIGRSRKLPGSFSTAFTDSVRAGLIVGQRRRPAEPAADNAVEVAF  
LGGVLISTSEAAGVVGRDRRSFFDGPKKPKFPSIVLVGLVDQPVPTIVGMPQQNPYPGPPPPSYAP  
PSYPAPPSYSPPSYPPPSYPPAYAPPPSPYAPQSYMAPPYQPPQYAPAAPAPMHPQAAQQLPA  
PELQQHEQSVVPAQEDLKPTEADPPAPAAKNVETESSDAAPSTESTNSDGKSE

>*Drosophila\_melanogaster\_CRZR* (AAM21341.1)

MEDEWGSFDRLPSPVPSASMDLETENEVVSNWSTLANFTRLVAGAAPEIVNYTLNMIDVGVGMATDI  
SNLSVSTTPLPAYAISNSSSLAHTNSRHEAPPMAEQVPEHVMHDHAPQLSRSGLLKVYVLAVMALFS  
LLGNLLTIWNIYKTRISRRNSRHTWSAIYSLMFHLSIADVLVTFWFCIIGEAAWCYTVQWLANELTC  
KLVKLFQMFSLYLSTYVVLVIGVDRWIAVKYPMKSLNMAKRCHRLGTYILSLVLSLPQFFIFHV  
ARGPFVEEFYQCVTHGFYTADWQEQMYATFTLVFTFLLPLCILFGTYMSTFRTISSSEKMFQGSKL  
ANYSTAKLPTQTNRQRLIHKAKMKSLRISVVIIFLICWTPYVMMIMFMFLNPDKRLGDDLQDA  
IFFFGMSNSLVNPLIYGAFHLCPGKGGKSSGGGNNNAYSLNRGDSQRTPSMLTAVTQVDGTGGSS  
RQMRAFRQQSYRSSSNGTAGPGAAPFKEQVGLLHVGPNGTPGGSVSSGATPQLIRKGSALLARQ  
PSCLREQEHQQRLLHEKPSTLVLSYDSQRRGGVGVGVASGLLDNNERVSSV

>*Ixodes\_scapularis\_CRZR* (from WGS, ABB010847221.1 and  
ABJB01088645.1)

MWLSRCLGCVLLAATVLSVAIALDSGGNSTLPGDECAPGNATCGTEPLHAPVFQPSLIRVVIL  
VLIGVLSLVGNCATLVSIWKTRLRARSTVYLLLAHLSVADLLVTFFCVLAEAAWTWTVQWTAGDGA  
CKAVKFLQMFSLYLSTFILVVIADFRAAIRFPMRRASARRTVVRMVFGVWALSAMLSLPQVFIFR  
VQRGPFEEEFYQCVTYGFYSAQWQEQLYTTVSLVLMFLLPLVTLITTYICTFYTISIQRSFFVPSK  
DGASGSGKHTQENHEPQARRHAKAETLAAPTHSAMDDARRKLLHKAKMKSLMITVVIVLAFIVCWT  
PYYCMMIIFIFLDPDDQLTEELQAGIFFFGSSTAMINPLIYGVFHLRRRPSRGSKQFNSSVASRGA  
ENSVLLTNCPRRTRSGHQPPQQLRMVQQTSHPVVRLKYSVVSNGCLKQKQATVVDVEDIDR

>*Nasonia\_vitripennis\_CRZR* (from WGS, AAZX01006363.1,  
AAZX01010633.1, AAZX01000283.1, AAZX01013590.1 and AZX01015155.1)

MYVLEEEPCLNIRNASGLISTNILRNSSCLGHAPQLTYGAYLRAVVLLSMTLLSFLANLATIWSIK  
SNKRKSQNCSAIYSLILHLSVADLFTVFCMGGEALWSYNVAWIWGNACKAFKFLQMFSLYLSTF  
VLVLIGIDRFVAVKYPKMTLNTAKKCNQLISFIWFISFILSTPQVVIHVAQGPFIEDFSQCVTHG  
FYTEVWQEQLYTTLISLIFMFIPLTILITTYMSTVITARSERLFKSELANSSSAHKTGDVNRRL  
IHRAKTKSLRISVVIVVAVFLWWTPTYIMMIIFMFLNPDKHVSADMQKGIFFFGMSNSLVNPLIYG  
AFHLWPQKKNRKHRENSIMQLRSTTTNASLMMDHRSTNARFTKQTKYSHIQTHEGLSVNHDTVVVH  
LIENSEKNKFCGRAAKIILHYNLPTKSN

>Strigamia\_maritima\_CRZR1 (from WGS, AFFK01019957.1)  
MLELDMNGTLNASQLLEAPAFSKQRLIKSLVLAAMAFVSLVGNVATLVNLSRSKRRTVSTMYMLIT  
QLAIADLLVTFCLVPESVWAATVQWLAGDALCKIIKYLQMFSLYLSTFVLVLIGIDRFIAIRLPM  
DRSDAHRKCNLLIVCVWLISALLSIPQMFIFRVRRGPFVQDFYQCVTHGYTTEWEEQVYTTATLV  
LMFILPLLTIVTTYICTFCTIARNEQVFREYDSDKQMHVSRQKLFKAKIKSLQITVVIVLAFVVC  
WTPYYTMMITYIFLDPVSHLSQEVQAGIFFFGMSNSMVPVIYGAFHLRKRGGKRRYLSSRFQSQS  
TASVRKKKDTSTKGVSFAPDPETTCGVTVVEEVVEEVVEELDLNHFDNRSNSNDDFAKTTTNI

>Strigamia\_maritima\_CRZR2 (from WGS, AFFK01020014.1)  
MEDINRTNTSVLMATAPAFNEQRLIKSVVLAVMAVLSLIGNVATLINLYRSKRRTVSTMYMLITQL  
AVADLLVTFFCVVPESVWVATVQWLAGDAMCKIIKYLQMFSLYLSTFVLVLIGIDRFIAIRLPMER  
SNAHRKCNVLIGCVWVLSALISIPQVFI FRVRRGPFEEFDYQCVTYGFYTTVWEEKLYTTSTLVLM  
FILPLLTIIITTYICTFYTIARNEQVFRECDSDKQMHVLRQKLFKAKIKSLQITVVIVLAFVVCWT  
PYMMMLTYIFLDPEAQLSQEVQSGIFFFGMSNSMVPVIYGAFHLRKRGGKRRYQSSRFQSQSTI  
NLKKRKNNAASSALETTGVSVVEEETVLNHFENRCQDEFVNAKTTSNI

>Capitella\_teleta\_CRZR/GnRHR (ELT93721.1)  
MDSKWIPDITINNKSI TAFELSFLSSIRPELFSKNFTSFNRTAVQLLFSNHTFVAYFLEKLPRIPI  
FNEMSMIKTVVLSCMFVVAFIGNTATLVQMYRMRRRKSTINLLLLHLAIADLLVTFFCIVSEAVWA  
STIQWFAGNFMCKLVKFLQVFGLYLSTYIIVI IALDRCLAILDPMsrnrAPRRVRTMITVAVIMAG  
FFSTPQIIIFKVERGPFPEDFQCVTYGTYSQPWQEQLYSCLSVGFMI IPLVAMVSAYMLIFHTI  
AKKSRDFQRAASDMLSRGPVRGQLFRKAKVKSLRMTAVIVVAFIVCWTPYFVILILHTFSSNKLDE  
KSSLWIFFFGMANSMINPLIYRAFQISKNRKRKR

>Crassostrea\_gigas\_CRZR/GnRHR (from WGS, AFTI01018035.1)  
MNYSSMSSFAIGNPPEVPYNHSGSSSTALTNVLLNGSEPRPNMTGDNALSTTESPMPPTFQDSLVT  
VVLILLFTISFIGNTATLIQMYRVRKRRSTINTLIVNLAVADLIVTFFCMAAEAVWALTQWVAGV  
AMCKMLRFIQGTGLLVSTYITVVISLDRCCVIDPI SRNKAPQVRVIMISWFLSALFSIPQALL  
FSVHRGPFKEDFYQVDILGYPSPAYKKLYNIFCMIIQFFLPLTLMI IAYGLIFFTISRKSKEFGE  
PENVSNSSDQREHSGRSHVRSGLLRKAKRKALRMSLFIVIAFFVCWLPYYVVFTGFAFGHWTSLDP  
SLMSGLTFVGLTNSILNPIIYGAFQLCKVPNNPRLVWRTIVSKPSSNDFMYILPMEIKMGNGRRLR  
IRSNSNQLYLQTS

>Lottia\_gigantea\_CRZR/GnRHR (ESP05621)  
MNYFEVIGNDSSINRSGNWGII IPEPQPPTFDDIAMTKCIVFGTMFVIAFIGNVATLIQMYRMRHR  
KSTINTLIVNLAIGDLFIVCFCFPVEGIWAATVQWYGGTAMCKIIKFIQVFSLYLSTYVTVAIGLD  
RCVAILDPMRRKSAPTRVRTMIMLAWFFSALFSIPQAIIFNVRRGPFKEDFYQCVTMGSYPNAWQE  
EVYSIASFLLMFVIPLVIIGTAYGLIFSTIARKSKEFIKKNPTVRTTSYNDIQRGPVRSNLLRKAK  
RKSLRMSIVIVVVFVCMWTPYYVIFICTFLDWEIENPRIYRLVLWLFFLGMSNAVMNPLIYGAFQ  
ICKVHTPRSVHLRAFRSHKILLLFYSKFYDGFMEG

>Octopus\_vulgaris\_CRZR/GnRHR (Q2V2K5)  
MDYLNDSMFNNMTYNITSTPLPDAPRFDNVYVSKLCVLGTVFVISFFGNTLVIIQIFRIRGSRSTI  
QSLILNLAIADLMVSFFNILMDIIWSATVEWLAGNTMCKIMKYLTVFGLHLSTYITVSIALDRCA

ILSPMSRSKAPLRVRIMITMAWVLSAIFSIPOAVIFQEQRKMFROGMFHQCRDSYNALWQKQLYSA  
SSLILLFVIPLIIMVTSYLLILKTIVKTSRQFHDTPI SPTSMSCYSVNHGQIRTHL FERARKRSSR  
MSAVIVAAFILCWTPYYIIIFLGFAFFQWDNSRTVIYFFTLGTSNCMLNPLIYGAF TIYKVHRGRSG  
SANSPSGTRLMIMVNRGRSTTTTTNRMSGSGRRQLTTGQTITQCASLTNPHQPVRPSPGINSTTS  
PNGKMPTKPPG

>Ciona\_intestinalis\_GnRHR1 (NP\_001028997.1)

MMTSDISQGATNIDNNWTSTAAVLGLNSTVNSTALPCEAHDVLIQTWFQFDTLHLVRLVLTWLLFC  
LSMAGNMFVLSLGRSRSRHFIMFHLALSNIYTI FVMPSDAVWNTTMEWLAGDVMCRLCQMMKQF  
GMYASSFMVVIGADRVTGILSPLPCHSQRKRGYIMVATAWISSLICCLPAGFIFSVAS IPTCEGI  
PIYQCIDFNVLQDVSLLRPYYFFTMCMSFLLPLICTLVSYSLIVCEI STMKERDRVLMGRRHSVNT  
ASIQRAKNRTILMRTLITLTLFLVCWGPYYGKGIYDWFIRYEDHTPPDAWDTVMYVVMYLNPLVHPI  
VFGVFLKEIRGKFKQRLNCARKRFFKQGDFTVPNAQSSMNYSIASVLNRPRRMSSTSRGSFSSYA  
TGATHLNGSSHVTINGQCSNNGSNGSIKTQPQFFGANRMVAPQQQLLLSSESAL

>Ciona\_intestinalis\_GnRHR2 (NP\_001028996.1)

MTTAAFTQDYVDGIYPSTATDTFMPMCQSHDTIIQTWFQFDTLYLVRVLTWLLFCLSMAGNMFVL  
WSLGRSRSRHFIMFHLALS DLIYTI FVMPSDAVWNTTMEWLAGDVMCRLCQMMKQFGMYASSFMVV  
VIGMDRVTAILSPLTHEGQRKRGYCMVLAAWTTSLLCCIPAGALFSLLTVETCEGINVYQCVDFNI  
VKDRSLLRPYYFFTMCMSFLLSLICTLVSYSLIVCEISNMKERDRVLMGRRKSVNTASIQRAKNRT  
ILMRTLITLTLFLVCWGPYYGKGIYDWFQKPAIGPPAPLDTAMYIVMYLNPLVHPIVFGVFMKEIRS  
KFKKTSCVAGLKRKRQVRSRGSVSRSLTSYATGLTQVQYLSNGAAETTVLTGATQQVPSLDES VH  
TKAPE

>Ciona\_intestinalis\_GnRHR3 (AAW70562)

MATVSSLVTTTATVMDGTTMSTHITSTFDINASYHSLNSTLDPNSTYFEKWCPYYHKMLTFNTIQ L  
TRV IITWILFLVSTCGNSFVLYCLCMRKQRLHVHVITMHLTLADLAFTFFSMPMDATWNTTMAWLG  
SEFLCRLCQFLKQFGMYISSLMVVVIALDRVFSILSPMSANQQRKRTKILLISAWTSLLLCAIPAL  
FLFSLIKKQFCPDQPIFYQCVD FSPNINKQDLKPYFFTMCVSFLIPLFFTVISYSLILCEINAMQ  
RRDERITGRDNNIERARMKTLVLTSLVTL SFIVLWGPYYAMGIYHWFNPRERATFPKEISVGLFV  
LMYFHPAVHPILYGF FMKDIRKHFLVTLMRCFKLSRIPASRRASEKFGSCQRHLPEGNPHPRAGRA  
ASSPLLSPV TERTVLRATSVPFINAGKCNKNNNRQEIFLQVPPTNGELSTKRCCDERV

>Ciona\_intestinalis\_GnRHR4 (NP\_001028994)

MMTSPTMTSNITGCNVTSTYSPEFIIENQYDCDAMFESFLSSQRLVFDSYHLTRIWVTWVIF F ISL  
AGNLTVLISVTVLRKTQSYSHCQLIMTHLSLANLAFTLFLVLPMDAIWNYTLEWLAGDVMCRIMNSL  
KQFAMYISSAMIMVMGVDRVTGLLRPV SANQQRRRIVKFLTVAWVFSFINSIPPSVMFSAGPYWPM  
RCECPNHVYVVCVDFHLIKKGREIFYIYSMFISFFIPLYCIIICYLI IAFSIAKMAKRAKATELOS  
SGFRPPSSRKS LARRSLQRAKKISQLVTGLITITFVICWGPYYVGLMHWFNEQHIERLPEGIMLM  
SLYLNPCLHPFITVCLMKEIRESICRKPNC SLATPR

>Danio\_reio\_GnRHR1 (NP\_001138452)

MSGNVSLSLISLLENSSLASSSSPQSPQWETPTFTTAARYRVVATLVLFVFAAVSNLSVLISVTRG  
RGRHLASHLRLLIASLASADLVMTFVVMPLDAIWNITVQWYAGDAMCKLLCFLKLFAMHSAAFILV

VVSLDRHHAAILHPLEALDAGRNRNRVLLAAWILSVLLASPOLFIYRALKAEGVDFVQCATHGSFRH  
RWQETAYNMFHFVTLYVFPVLLVMSFCYTRILVEINRQMPRGKKGGEPCLRRSAGADMI PKARMKTL  
KMTIIIVASFVVCWTPYYLLGIWYWFQPRMLQVTPVYAHHALFVFGNLNTCCDPVIYGFPTPSFRA  
DITSCFSRRNQNCSPKSLDRLSARRGGASGEAESDPGSGDQPSGQTA

>Danio\_rerio\_GnRHR2 (NP\_001138451)

MNTTQLIEDLLQNSSCKHEAKHLNSNIAGDLPHPHLPRFTAASQVRVTLTLVLCALSACCNLAVL  
YSANNQQRKRSHVRLIITNLAAADLLVTFVVMPTDAVWNITLQWRAGDLACRTLMFLKLVAMYS  
CA FVTVVISLDRQAAILNPLSINKAMRRNKVLLGVAWTMSVLSIPQVVFVHVVEIDSPKQFVQCTTY  
GSFSSRWQETFYNMFTFTFLFLLPLFIMISCYTRILFEISKMTEDRLLSNKVQLRRSKNNIPKAR  
MRTLKMTVVIVLSFMVCWTPYYMLGLWYWFSPAGLEETVSQSLSHILFIFGLLNACLDPIIYGLFT  
VPLCRGMRHRQREQNIVAFELENTNNSLMTSIRTSTSPPLTLKRLAVQQTSREKLEWDAEFVLKTGD  
DGTKNALYSSGVATVE

>Danio\_rerio\_GnRHR3 (NP\_001170921)

MSGNWSQYNASLLPVWTAPSFTPAARVAATALLFVFAAGSNLALLVSVCRSRRLASHLRPLIIS  
LAAADLLMTFVVMPLDMVWNVTVQWYAGDVVCKLLCFLKLFAMQTSAFILVGISLDRHQAILRPLD  
TLTAPQRNRRRMLTAWLSALIASPOLFIHFTVKAKSVDFTCVTHGFSERWHETAYNMFHFVTL  
YVIPLLVMSCCYTCILIEINRQLHNSNKGDSLRRSGTDMIPKARMKTLKMTLIIVLSFVVCWTPYY  
LLGIWYWFQPEMLTVTPEYVHLLLFVFGNLNSCCDPVIYGLYTPSFRSDLIRFCCCRHHKNTPRPQ  
QPTRHT

>Danio\_rerio\_GnRHR4 (NP\_001091663.1)

MNDSSPTSENIMFHQLTADTLNGSCDLPTCANNNGEAAALQLPTFSMAAKVRVITFTLCAVSAVCN  
LGVLWAASTNNKRKSHVRILIMNLTVADLLVTFIVMPVDAAWNITVQWLAGDLACRLLMFLKLVAM  
YSCAFVTVVISLDRQSAILNPLAINKAKKKNKIMLSVAWAMSVVLSVPMFLFHNVTITVPANFTQ  
CTTRGSFVKHWQETIYNMFTFICLFLIPLAIMICCYTRILVEISRMTKGNISSKEVHLRRSHSNI  
PKARMRTLKMSIVIVTSFIVCWTPYYLLGLWYWFLEPEDLEETVSHSLTHMLFIFGLFNAILDPITY  
GLFTIHRKGLKRYCRSAVVLTESENNSIITGSLKCSPPFRMKRVTQSGTGTDPKQNTSTVGEED  
KKAADGKTKE

>Gallus\_gallus\_GnRHR1 (NP\_989984)

MCVPAALIEAEPHPHTTEGDTNTSATHCLEHWVEPRFTKAAKVRVAITAVFFLLAACSNNTAVLGS  
LLRKRKCHVRPLIISLALADLLVTVAVMPLDAAWNVTVQWYGGDLCKLLNFKLKFAMYAAALVL  
VVISLDRHAAVLQPFARARRRNGLLRAAWLGSVLLASPOLFLFHVHTVPGGNFTQCVTHGSFRAH  
WEETVYNMFTFTTLYITPLSIMIVCYVRIIWEISKQLKINKSLVRSQNDHISKARMKTLKMTIVIV  
ASFIICWTPYYLLGLWYWFHPAMIQRMPEYINHSFFLFLGLLHTCTDPIIYGLYTPSFREDVQLCLR  
GIEAAISQHRHKPISVSEKTTKGDVNGQVTSGGSNGTTVNTVC

>Gallus\_gallus\_GnRHR2 (NP\_001012627.1)

MARLGGGTGQDAAAAGGGWLDPGPTVGNVSTEPSSSTSHPKRGCAWSRLESAAEPLLLPTFSPAA  
QARVAATFVLFVLSAGCNVAVLRAAGGRGGGRSHIRVLLRHLAAADLLVTVVVMPLDAIWNITLQ  
WRAGDLACRLLMYLRLLAMYASAFVTVVISLDRQAAILRPLAIARARCRNRAMLRAAWMLSAALAV  
POLFLFHTVTLHAPHNFTQCTTHGSGFPQWHETLYNMLSFSCFLLLPLLIMVCCYTRILLEISRMR

GSSLFSSRDVPLRCSGNSIPRARLRTLKMSLVIVSSFILCWTPYYLLGLWYWFPCPRAMQQKVPPSL  
SHILFIFGLFNACLDPITYGLFTIPFRRRCGCPCGHSSEPEPPSPATGSFHCSASSLRGRQGMGGT  
EGPHPIELGLPTGAGSCQSSAL

>Homo\_sapiens\_GnRHR1 (NP\_000397.1)

MANSASPEQNQNHCASAINNSIPLMQGNLPTLTLSGKIRVTVTFFLFLLSATFNASFLKQKWTQK  
KEKGKLSRMKLLKHLTLANLLETIVMPLDGMWNITVQWYAGELLCKVLSYLKLFMYAPAFMM  
VVISLDRSLAITRPLALKSNSKVGQSMVGLAWILSSVFAGPQLYIFRMIHLADSSGQTKVFSQCVT  
HCSFSQWWHQAFYNFFTFSCFLIIPLFIMLICNAKIIFTLTRVLHQDPHELQLNQSKNNIPRARLK  
TLKMTVAFATSFTVCWTPYYVLGIWYWFDPPEMLNRLSDPVNHFFFLFAFLNPCFDPLIYGYSL

>Strongylocentrotus\_purpuratus\_GnRHR1 (NP\_001116990.1)

MAVPTSHRDGSEPGMNAEWGKPGGFDGADVVI IAPTMDIGFAYNYSLNDSLSDASGNETDFEVPVFT  
PEYLIRVVTLTSIMVLSGPLNVAVFASLWRERRRKSRIINLLIMHLTLADLLITFINIPTDVIWFCT  
VRWLAGNVMCKLLMFI ESSAMYASSFVLIVISLDRFAAIVHPLSVSKADRRCKIMLRVAWSSSVFC  
SIPQLFVHEVGSPPEDPSFTQCVDYNFANNRRLWVLYHVFTLAMYIVPLIAIFGCYVAIVYKIC  
KKSREVTKALKNGNHPGLRRTGLDRLPRARMKALQLTATIVTAFIICWSPYYIVSTWYHFDSGWQS  
EEKKMLKPEWVIDVLMALGYSNICVDPIIYGLFSTKLWRQLRSCWKKKSLSDSRSPKTMKRTLSS  
SHSTVTRATSVRFGVMTSVHSCPHEHPGIEMSHMTQTRVDSVSD

>Strongylocentrotus\_purpuratus\_GnRHR2 (NP\_001116992)

MTRTTYLSPVTTESAIIHRLNISLFEGLSNYTTAANFSDYDFS YFTESPDSNSSISKPTTFELAYL  
IRIITLSTILVLSVPLNFIVLLTVWRQRGRKSRVNLLVLHLTIADLLITFINISTDVVWFCTVAWL  
AGNTMCKLIMFMETFAMYASSFVLIVISIDRYAAIVHPLSVRAADRRCKIMLRVAWGSAAVCSIPQ  
LVVHELMSPSFNPTFYQCVDYGFKEKYFRLWVLYHIFVTLIMYVPLATIFACYSSIVWKIVRRTN  
GLTWSKPKGKTTLRMAGNDGIPRARMRAFRLTAAIVGGFVICWSPYYVSTWYHVDHGWQDESEP  
PDPFWLFDVLIALGYLNTCVDPVLYGIFTTKLARDVRHCWRTSKPVARGRQLTSRRSTSSSNNNP  
VTVGSSVRLGMTTVNVVSEERQAVHFSIPDEDERTVIP

>Strongylocentrotus\_purpuratus\_GnRHR3 (NP\_001116991)

MLDLARTLKSPKSATIMSSFYIPDVGSDYANVTNTNYTYMDSGSAEIFAESLFRILTLSAIFLISVP  
LNIIVLIIIVFRRRRHKSRVNILVMHLTLADLFVALINIPTDVVWFYTVRWLAGNAMCKIIMFIESF  
NMYGSSFILIVISLDRYAAIVHPLSIHQADRRCKIMVRAAWTCSALCSVPQFLVHEVLSPYEAPDF  
TQCVDYRFAFEHPTLWRLYHVFTLAMYVPLITIFTCYAAIIYKICRKTQARQSINNESSVLR  
RSCSSSLPRARMKALRLTATIVTAFIMCWGPYYVLSTWYHFDIRWQTGAGLPNPDWMIHIMMALGY  
SNICLDPIIYGIFITRFLCQRRGKSAVMHPLTTYRRSTMNSKVIITNDGHTSSVRFNHTLVSSKNS  
CSGTHAAVDTVTPLPDS DTRNNFVNRRTSTT

>Homo\_sapiens\_rhodopsin (NP\_000530.1)

MNGTEGPNFYVPFSNATGVVRSPEYYPQYLAEPWQFSMLAAYMFLLIIVLGFPINFLTYVTVQHK  
KLRTPLNYILLNLAVADLFMVLGGFTSTLYTSLHG YFVFGPTGCNLEGGFFATLGGEIALWLSLVLA  
IERVVVCKPMSNFRFGENHAIMGVAFTWVMALACAAPPLAGWSRYIPEGLQCSCGIDYYTLKPEV  
NNESFVIYMFVVHFTIPMIIIFFCYQLVFTVKEAAAQQQESATTQKAEKEVTRMVIIMVIAFLIC

WVPYASVAFYIFTHQGSNFGPIFMTIPAFFAKSAAIYNPVIYIMMNKQFRNCMLTTICCGKNPLGD  
DEASATVSKTETSQVAPA

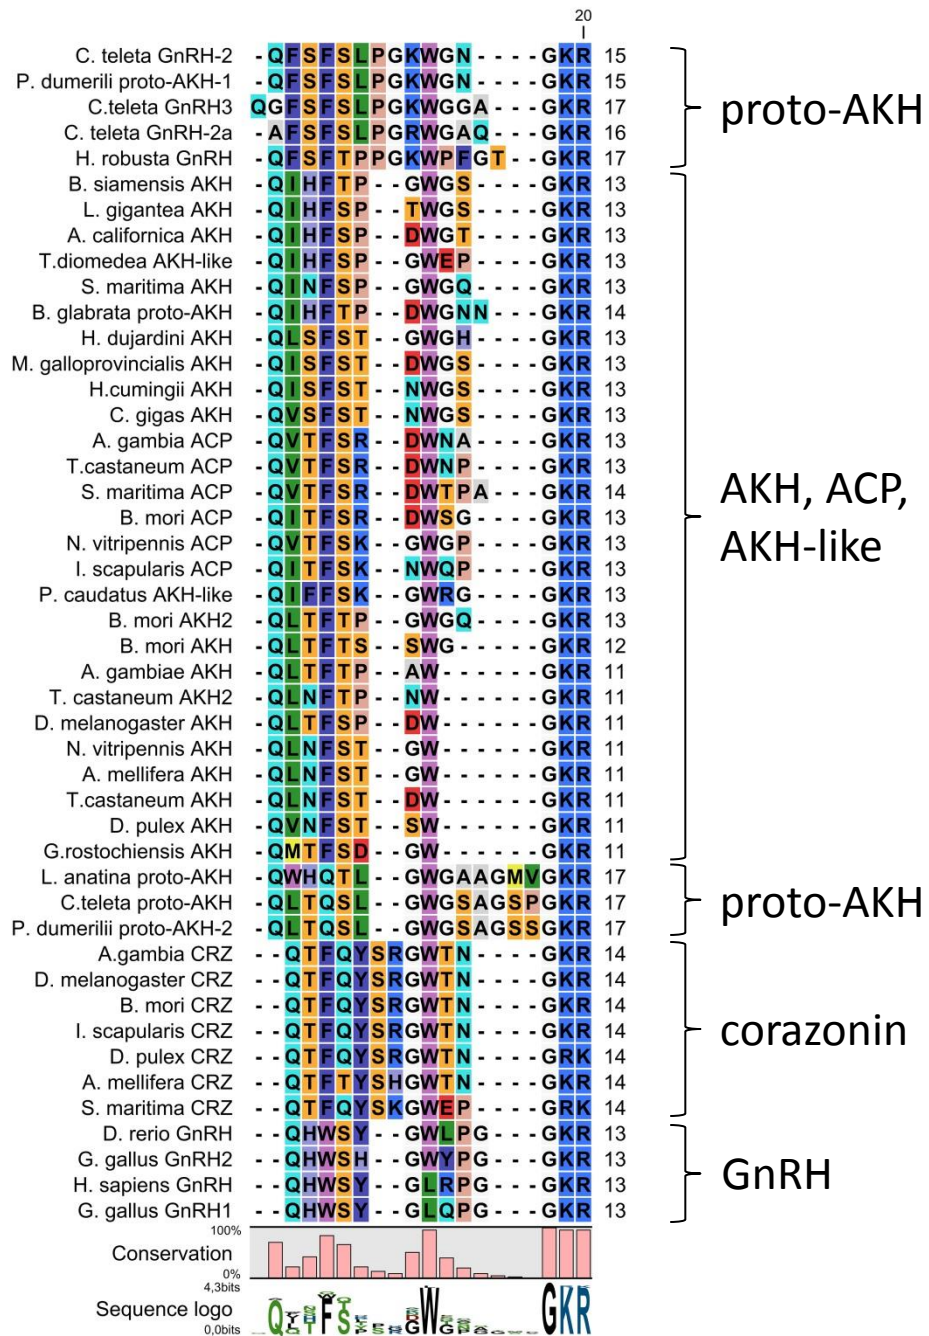

Fig. S6



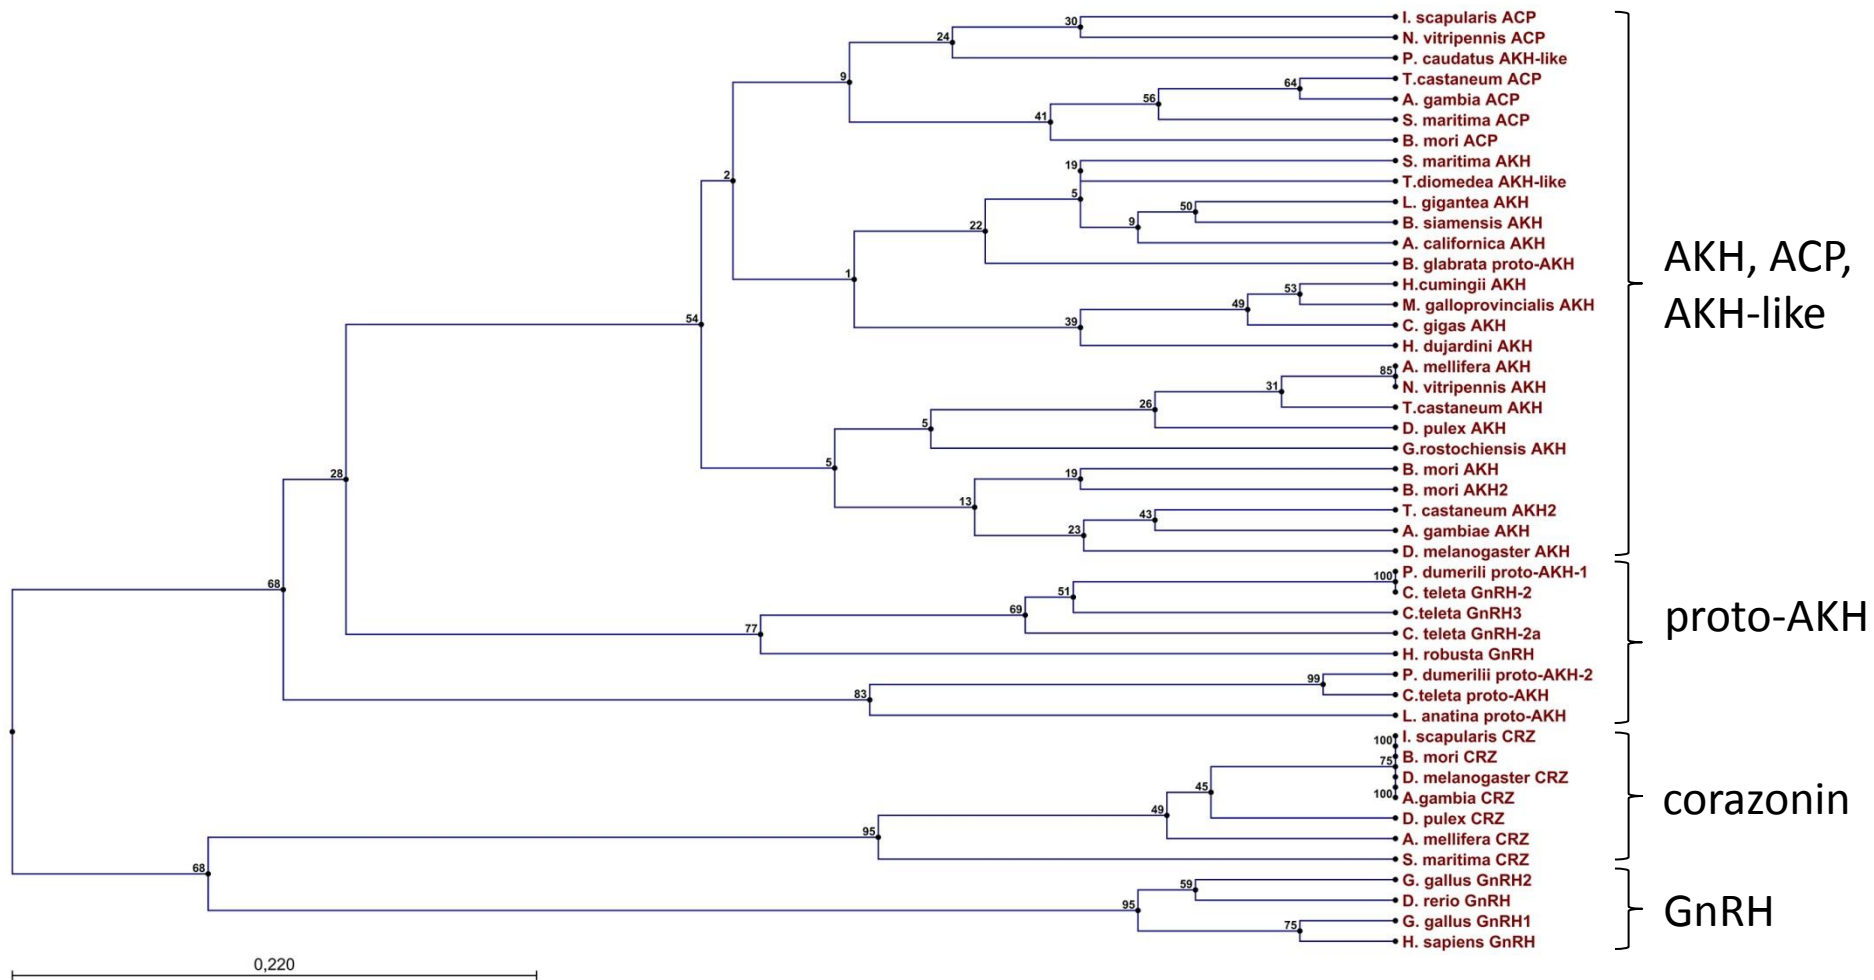

Fig. S7
